# Supplementary material for: Metabolites Secreted by Bovine Embryos In Vitro Predict Pregnancies That the Recipient Plasma Metabolome Cannot, and Vice Versa
Source: MDPI journal article supplement (doi:10.3390/metabo11030162), 2021-03-11
Supplement: s1 [file s1]

Supplemental Table S1

Metabolites identified in embryo culture medium

| Metabolite*                     | Mass (m/z)** | RT (min) | CAS Number |
|---------------------------------|--------------|----------|------------|
| 2-hydroxypyridine               | 152.05       | 5.48     | 142-08-5   |
| Pyruvic acid                    | 174.11       | 5.75     | 127-17-3   |
| L-(+) lactic acid               | 147.07       | 5.91     | 79-33-4    |
| L-valine 1                      | 72.08        | 6.24     | 72-18-4    |
| Acetohydroxamic acid            | 146.06       | 6.64     | 546-88-3   |
| 3-hydroxypyridine               | 152.05       | 6.94     | 109-00-2   |
| Oxalic acid                     | 147.07       | 7.06     | 144-62-7   |
| L-leucine 1                     | 86.10        | 7.22     | 61-90-5    |
| DL-isoleucine 1                 | 86.10        | 7.52     | 443-79-8   |
| 2-ketoisocaproic acid 2         | 200.07       | 8.10     | 4502-00-5  |
| Ethanolamine                    | 73.05        | 8.36     | 141-43-5   |
| L-ornithine 2                   | 144.12       | 8.47     | 6600-40-4  |
| Benzoic acid                    | 179.05       | 8.50     | 65-85-0    |
| L-serine 1                      | 116.05       | 8.70     | 56-45-1    |
| Caprylic acid                   | 201.13       | 8.72     | 124-07-2   |
| Phosphoric acid                 | 299.07       | 8.98     | 7664-38-2  |
| Glycerol                        | 147.07       | 8.99     | 56-81-5    |
| L-threonine 1                   | 73.05        | 9.22     | 72-19-5    |
| Glycine                         | 174.11       | 9.40     | 56-40-6    |
| Succinic acid                   | 148.07       | 9.41     | 29915-38-6 |
| Glyoxylic acid                  | 184.04       | 9.76     | 298-12-4   |
| Pelargonic acid (nonanoic acid) | 215.09       | 10.03    | 112-05-0   |
| Capric acid                     | 229.07       | 11.29    | 334-48-5   |

|                                        |        |       |            |
|----------------------------------------|--------|-------|------------|
| L-glutamic acid 3 (dehydrated)         | 156.01 | 12.20 | 56-86-0    |
| Aspartic acid 2                        | 232.12 | 12.22 | 56-84-8    |
| Phenylalanine 1                        | 120.06 | 12.44 | 63-91-2    |
| Lauric acid                            | 257.07 | 13.63 | 143-07-7   |
| N-(2-hydroxyethyl)iminodiacetic acid 2 | 312.40 | 15.56 | 93-62-9    |
| Citric acid                            | 273.10 | 15.70 | 5949-29-1  |
| Myristic acid                          | 285.05 | 15.76 | 544-63-8   |
| Tyrosine 1                             | 179.05 | 16.25 | 60-18-4    |
| L-gulonic acid gamma-lactone           | 333.06 | 16.51 | 1128-23-0  |
| Gluconic acid lactone 2                | 217.11 | 16.67 | 90-80-2    |
| Palmitic acid                          | 313.40 | 17.72 | 64519-82-0 |
| Myo-inositol                           | 305.14 | 18.47 | 87-89-8    |
| Stearic acid                           | 117.08 | 19.51 | 57-11-4    |
| 1 monostearin                          | 400.01 | 23.82 | 123-94-4   |

---

\*1 and 2 indicates different number TMS derivative moieties

\*\*Quantifier ion used (identification was based on full EI spectrum match)

Supplemental Table S2

Metabolites identified in recipient plasma both on Day-0 and Day-7

| Metabolite*             | Mass (m/z)** | RT (min) | CAS Number |
|-------------------------|--------------|----------|------------|
| L-(+) lactic acid       | 235.12       | 5.01     | 79-33-4    |
| Pyruvic acid            | 174.12       | 5.75     | 127-17-3   |
| Glycolic acid           | 147.07       | 6.11     | 79-14-1    |
| L-alanine 1             | 73.05        | 6.49     | 56-41-7    |
| Ornithine 1             | 75.03        | 6.55     | 6600-40-4  |
| Acetohydroxamic acid    | 133.02       | 6.64     | 546-88-3   |
| 6-methyl-5-hepten-2-one | 240.24       | 6.75     | 110-93-0   |
| Oxalic acid             | 147.07       | 6.93     | 144-62-7   |
| 2-hydroxybutyric acid   | 133.02       | 7.05     | 565-70-8   |
| Propylamine 1           | 232.13       | 7.07     | 2043-43-8  |
| 2-ketoisocaproic acid 2 | 200.07       | 8.10     | 4502-00-5  |
| L-valine 2              | 144.12       | 8.13     | 72-18-4    |
| 2-butyne-1,4-diol       | 147.07       | 8.30     | 110-65-6   |
| ethanolamine            | 174.12       | 8.36     | 141-43-5   |
| Benzoic acid            | 179.12       | 8.49     | 65-85-0    |
| Urea                    | 189.09       | 8.51     | 57-13-6    |
| L-serine 1              | 116.09       | 8.69     | 56-45-1    |
| L-leucine 2             | 158.07       | 8.92     | 61-90-5    |
| DL-isoleucine 2         | 158.07       | 9.23     | 443-79-8   |
| Glycine                 | 174.12       | 9.40     | 56-40-6    |
| Glyoxylic acid          | 184.04       | 9.77     | 298-12-4   |
| Fumaric acid            | 245.12       | 9.88     | 17013-01-3 |
| L-threonine 2           | 219.11       | 10.54    | 72-19-5    |

|                                        |        |       |            |
|----------------------------------------|--------|-------|------------|
| Hydrocinnamic acid                     | 104.06 | 10.79 | 501-52-0   |
| DL-3-aminoisobutyric acid 2            | 174.12 | 11.35 | 10569-71-9 |
| Trans-4-hydroxy-L-proline 2            | 230.11 | 12.29 | 51-35-4    |
| Iminodiacetic acid 2                   | 232.13 | 12.31 | 142-73-4   |
| Phenylalanine 1                        | 120.06 | 12.44 | 63-91-2    |
| Creatinine                             | 115.00 | 12.65 | 60-27-5    |
| Threonic acid                          | 292.13 | 12.80 | 7306-96-9  |
| Alpha ketoglutaric acid                | 198.08 | 12.87 | 328-50-7   |
| 2-hydroxybiphenyl                      | 211.00 | 13.11 | 90-43-7    |
| L-glutamic acid 2                      | 246.14 | 13.39 | 56-86-0    |
| 2-amino-2-methyl-1,3-propanediol 2     | 192.09 | 13.46 | 115-69-5   |
| Lauric acid                            | 257.07 | 13.63 | 143-07-7   |
| Pyrophosphate                          | 451.08 | 14.02 | 0-00-0     |
| Trans-aconitic acid                    | 229.11 | 14.83 | 585-84-2   |
| Glycerol 1-phosphate                   | 357.07 | 15.10 | 34363-28-5 |
| Azelaic acid                           | 317.10 | 15.27 | 123-99-9   |
| N-(2-hydroxyethyl)iminodiacetic acid 2 | 120.06 | 15.56 | 93-62-9    |
| L-ornithine 2                          | 142.07 | 15.62 | 70-26-8    |
| Citric acid                            | 274.10 | 15.70 | 5949-29-1  |
| Hippuric acid 2                        | 206.11 | 15.72 | 495-69-2   |
| Myristic acid                          | 285.04 | 15.76 | 544-63-8   |
| D-allose 2                             | 157.07 | 16.02 | 579-36-2   |
| 1,5-anhydro-D-sorbitol                 | 217.11 | 16.04 | 154-58-5   |
| D-mannose 1                            | 157.07 | 16.10 | 87-78-5    |
| phenaceturic acid 2                    | 91.05  | 16.16 | 500-98-1   |
| dehydroascorbic acid 3                 | 157.07 | 16.45 | 490-83-5   |

|                            |        |       |            |
|----------------------------|--------|-------|------------|
| D (+) galactose 1          | 205.11 | 16.54 | 59-23-4    |
| D-Glucose                  | 319.15 | 16.62 | 59-23-4    |
| L-lysine 2                 | 174.12 | 16.68 | 56-87-1    |
| D (+)altrose 1             | 273.10 | 16.76 | 1990-29-0  |
| Tyrosine 2                 | 218.11 | 16.85 | 60-18-4    |
| Galacturonic acid 1        | 333.06 | 17.03 | 14982-50-4 |
| 3-indoleacetic acid        | 202.11 | 17.06 | 87-51-4    |
| Conduritol epoxide 2       | 217.11 | 17.28 | 6090-95-5  |
| Isopropyl beta-D-glucoside | 217.11 | 17.38 | 367-93-1   |
| Palmitoleic acid           | 311.28 | 17.53 | 373-49-9   |
| Palmitic acid              | 313.26 | 17.72 | 64519-82-0 |
| Allantoin 3                | 259.12 | 18.18 | 97-59-6    |
| Myo-inositol               | 305.14 | 18.47 | 87-89-8    |
| Heptadecanoic acid         | 117.04 | 18.63 | 506-12-7   |
| Linoleic acid              | 67.06  | 19.25 | 60-33-3    |
| Oleic acid                 | 339.04 | 19.29 | 112-80-1   |
| L-tryptophan 2             | 202.11 | 19.49 | 73-22-3    |
| Stearic acid               | 341.02 | 19.51 | 57-11-4    |
| 1-stearoyl-rac-glycerol    | 399.33 | 23.82 | 123-94-4   |
| Alpha tocophereol          | 237.11 | 26.30 | 10191-41-0 |
| Cholesterol                | 329.32 | 26.43 | 57-88-5    |
| 5alpha-Cholestanol         | 215.12 | 26.49 | 80-97-7    |

---

\*1 and 2 indicates different number TMS derivative moieties

\*\*Quantifier ion used (identification was based on full EI spectrum match)

Supplemental Table S3

Individual ETs performed and description of recipients, embryos, bull breed and pregnancy diagnosis to term in discovery study and validation study with Holstein recipients.

| Day-0      | Study     | ET | Recipient |           | Culture to Day-6 | Embryo stage |                  | Bull |          | Thawing <sup>(1)</sup><br>re-expansion | Pregnancy diagnoses |          |         |
|------------|-----------|----|-----------|-----------|------------------|--------------|------------------|------|----------|----------------------------------------|---------------------|----------|---------|
|            |           |    | ID        | Breed     |                  | Day-6        | Day-7 blastocyst | ID   | Breed    |                                        | Day-40              | Day-62   | Birth   |
| 28/01/2014 | Discovery | 1  | 9         | Holstein  | BSA              | Morula       | Fully expanded   | A    | AV       | 3/3                                    | Pregnant            | Pregnant | To term |
| 28/01/2014 | Discovery | 2  | 23        | Holstein  | BSA              | Morula       | Fully expanded   | B    | Holstein | 3/3                                    | Pregnant            | Pregnant | To term |
| 11/02/2014 | Discovery | 3  | 1         | Holstein  | BSA              | Morula       | Fully expanded   | B    | Holstein | 2/2                                    | Open                | Open     | Open    |
| 25/02/2014 | Discovery | 4  | 15        | AV        | BSA              | Blastocyst   | Fully expanded   | D    | Holstein | 2/2                                    | Pregnant            | Pregnant | To term |
| 18/03/2014 | Discovery | 5  | 6         | AV        | BSA              | Morula       | Expanding        | A    | AV       | 2/2                                    | Pregnant            | Pregnant | To term |
| 03/06/2014 | Discovery | 6  | 4         | Crossbred | BSA              | Morula       | Fully expanded   | F    | AV       | 4/4                                    | Pregnant            | Pregnant | To term |
| 03/06/2014 | Discovery | 7  | 17        | Holstein  | BSA              | Morula       | Fully expanded   | F    | AV       | 4/4                                    | Pregnant            | Pregnant | To term |
| 03/06/2014 | Discovery | 8  | 19        | AV        | BSA              | Morula       | Fully expanded   | F    | AV       | 4/4                                    | Pregnant            | Pregnant | Open    |
| 30/07/2014 | Discovery | 9  | 1         | Holstein  | BSA              | Morula       | Fully expanded   | A    | AV       | 2/2                                    | Pregnant            | Pregnant | To term |
| 30/07/2014 | Discovery | 10 | 5         | Holstein  | BSA              | Morula       | Fully expanded   | A    | AV       | 2/2                                    | Open                | Open     | Open    |

|            |           |    |    |           |     |            |                |   |          |      |          |          |         |
|------------|-----------|----|----|-----------|-----|------------|----------------|---|----------|------|----------|----------|---------|
| 20/08/2014 | Discovery | 11 | 7  | AV        | BSA | Morula     | Fully expanded | B | Holstein | 2/2  | Open     | Open     | Open    |
| 17/09/2014 | Discovery | 12 | 24 | Holstein  | BSA | Blastocyst | Fully expanded | A | AV       | 1/1* | Open     | Open     | Open    |
| 15/10/2014 | Discovery | 13 | 18 | Holstein  | BSA | Blastocyst | Fully expanded | F | AV       | 1/1  | Open     | Open     | Open    |
| 12/11/2014 | Discovery | 14 | 3  | Crossbred | BSA | Morula     | Fully expanded | A | AV       | 2/2  | Open     | Open     | Open    |
| 10/12/2014 | Discovery | 15 | 24 | Holstein  | BSA | Morula     | Expanding      | A | AC       | 1/1* | Pregnant | Pregnant | To term |
| 21/01/2015 | Discovery | 16 | 19 | AV        | BSA | Morula     | Fully expanded | A | AV       | 2/2  | Open     | Open     | Open    |
| 10/06/2015 | Discovery | 17 | 2  | AV        | BSA | Blastocyst | Fully expanded | C | AV       | 1/1* | Open     | Open     | Open    |
| 11/09/2015 | Discovery | 18 | 26 | Holstein  | BSA | Morula     | Fully expanded | C | AV       | 1/1  | Pregnant | Pregnant | Open    |
| 15/09/2015 | Discovery | 19 | 25 | Holstein  | BSA | Blastocyst | Fully expanded | C | AV       | 2/2  | Open     | Open     | Open    |
| 29/10/2015 | Discovery | 20 | 11 | AV        | BSA | Blastocyst | Fully expanded | D | Holstein | 4/4  | Pregnant | Pregnant | To term |
| 29/10/2015 | Discovery | 21 | 16 | Crossbred | BSA | Morula     | Fully expanded | D | Holstein | 4/4  | Pregnant | Pregnant | To term |
| 29/10/2015 | Discovery | 22 | 17 | Holstein  | BSA | Blastocyst | Fully expanded | D | Holstein | 4/4  | Pregnant | Pregnant | To term |
| 29/10/2015 | Discovery | 23 | 27 | AV        | BSA | Blastocyst | Fully expanded | D | Holstein | 4/4  | Open     | Open     | Open    |
| 14/12/2015 | Discovery | 24 | 30 | Holstein  | BSA | Blastocyst | Fully expanded | C | AV       | 3/4  | Open     | Open     | Open    |
| 14/12/2015 | Discovery | 25 | 31 | Holstein  | BSA | Blastocyst | Fully expanded | C | AV       | 3/4  | Pregnant | Open     | Open    |

|            |            |    |    |           |         |            |                |   |          |     |          |          |         |
|------------|------------|----|----|-----------|---------|------------|----------------|---|----------|-----|----------|----------|---------|
| 14/12/2015 | Discovery  | 26 | 32 | Holstein  | BSA     | Blastocyst | Expanding      | G | AV       | 3/4 | Pregnant | Pregnant | To term |
| 05/05/2016 | Discovery  | 27 | 14 | AV        | BSA     | Blastocyst | Fully expanded | C | AV       | 3/3 | Open     | Open     | Open    |
| 05/05/2016 | Discovery  | 28 | 28 | AV        | BSA     | Blastocyst | Fully expanded | G | AV       | 3/3 | Pregnant | Pregnant | To term |
| 14/07/2016 | Discovery  | 29 | 20 | Crossbred | FCS+BSA | Morula     | Expanding      | C | AV       | 4/5 | Pregnant | Pregnant | To term |
| 14/07/2016 | Discovery  | 30 | 22 | Crossbred | FCS+BSA | Morula     | Expanding      | C | AV       | 4/5 | Open     | Open     | Open    |
| 07/09/2016 | Discovery  | 31 | 8  | AV        | BSA     | Morula     | Fully expanded | C | AV       | 4/5 | Open     | Open     | Open    |
| 07/09/2016 | Discovery  | 32 | 10 | AV        | BSA     | Blastocyst | Fully expanded | C | AV       | 3/3 | Pregnant | Pregnant | To term |
| 07/09/2016 | Discovery  | 33 | 21 | Crossbred | BSA     | Morula     | Expanding      | C | AV       | 3/3 | Pregnant | Pregnant | To term |
| 13/12/2016 | Discovery  | 34 | 12 | Holstein  | BSA     | Blastocyst | Fully expanded | E | Holstein | 3/3 | Pregnant | Pregnant | To term |
| 13/12/2016 | Discovery  | 35 | 13 | AV        | BSA     | Blastocyst | Fully expanded | E | Holstein | 3/3 | Pregnant | Pregnant | To term |
| 13/12/2016 | Discovery  | 36 | 29 | Holstein  | BSA     | Morula     | Fully expanded | E | Holstein | 3/3 | Pregnant | Pregnant | To term |
| 15/06/2017 | Validation | 37 | 35 | Holstein  | BSA     | Blastocyst | Fully expanded | H | Holstein | 3/3 | Open     | Open     | Open    |
| 15/06/2017 | Validation | 38 | 40 | Holstein  | BSA     | Morula     | Expanding      | H | Holstein | 3/3 | Pregnant | Pregnant | To term |
| 15/06/2017 | Validation | 39 | 43 | Holstein  | BSA     | Morula     | Expanding      | H | Holstein | 3/3 | Pregnant | Pregnant | To term |
| 10/08/2017 | Validation | 40 | 41 | Holstein  | FCS+BSA | Blastocyst | Fully expanded | E | Holstein | 3/3 | Open     | Open     | Open    |



|            |            |    |    |          |         |            |                |   |          |      |          |          |         |
|------------|------------|----|----|----------|---------|------------|----------------|---|----------|------|----------|----------|---------|
| 10/08/2017 | Validation | 41 | 42 | Holstein | FCS+BSA | Blastocyst | Fully expanded | E | Holstein | 3/3  | Open     | Open     | Open    |
| 10/08/2017 | Validation | 42 | 43 | Holstein | FCS+BSA | Blastocyst | Fully expanded | E | Holstein | 3/3  | Pregnant | Pregnant | To term |
| 21/09/2017 | Validation | 43 | 38 | Holstein | FCS+BSA | Blastocyst | Fully expanded | H | Holstein | 2/3  | Open     | Open     | Open    |
| 21/09/2017 | Validation | 44 | 39 | Holstein | FCS+BSA | Blastocyst | Fully expanded | H | Holstein | 2/3  | Open     | Open     | Open    |
| 03/10/2017 | Validation | 45 | 42 | Holstein | BSA     | Blastocyst | Fully expanded | G | AV       | 1/2  | Open     | Open     | Open    |
| 05/12/2017 | Validation | 46 | 38 | Holstein | BSA     | Morula     | Expanding      | I | Holstein | 2/2  | Pregnant | Pregnant | To term |
| 05/12/2017 | Validation | 47 | 39 | Holstein | BSA     | Morula     | Expanding      | I | Holstein | 2/2  | Pregnant | Pregnant | Open    |
| 18/01/2018 | Validation | 48 | 37 | Holstein | FCS+BSA | Blastocyst | Fully expanded | G | AV       | 2/2  | Pregnant | Pregnant | To term |
| 18/01/2018 | Validation | 49 | 46 | Holstein | FCS+BSA | Blastocyst | Fully expanded | G | AV       | 2/2  | Pregnant | Pregnant | To term |
| 08/02/2018 | Validation | 50 | 33 | Holstein | FCS+BSA | Blastocyst | Expanding      | I | Holstein | 1/1  | Pregnant | Pregnant | To term |
| 08/03/2018 | Validation | 51 | 34 | Holstein | FCS+BSA | Blastocyst | Expanding      | J | AV       | 3/3  | Open     | Open     | Open    |
| 08/03/2018 | Validation | 52 | 36 | Holstein | BSA     | Morula     | Fully expanded | J | AV       | 3/3  | Pregnant | Pregnant | To term |
| 08/03/2018 | Validation | 53 | 44 | Holstein | FCS+BSA | Blastocyst | Fully expanded | J | AV       | 3/3  | Pregnant | Pregnant | Open    |
| 04/04/2018 | Validation | 54 | 45 | Holstein | BSA     | Morula     | Expanding      | H | Holstein | 3/3* | Pregnant | Pregnant | To term |
| 04/04/2018 | Validation | 55 | 47 | Holstein | FCS+BSA | Blastocyst | Fully expanded | H | Holstein | 3/3* | Open     | Open     | Open    |

---

Recipients 1, 19, 24, 38, 39, 42 and 43 were transferred twice as heifers; recipient 17 was transferred once as heifer and a second time as uniparous, non-lactating cow.

AV: Asturiana de los Valles breed.

Crossbred recipients were used only in embryo culture medium studies, not plasma studies.

(1): N embryos that re-expanded in single culture prior to ET / N embryos thawed. Asterisks indicate unknown numbers of total embryos thawed.

Supplemental Table S4

Capacity of candidate metabolite biomarkers identified in embryo culture medium (CM) and Day-0 recipient plasma to predict pregnancy to term in Asturiana de los Valles recipients as single biomarkers and combined within a F1 score.

| Class               | CM           | Day-0 plasma       | Biomarker used |             |          |
|---------------------|--------------|--------------------|----------------|-------------|----------|
|                     | Capric acid  | Heptadecanoic acid | Only CM        | Only plasma | F1 Score |
| Birth               | 3447         | 250243             | True           | True        | True     |
| Birth               | 2547         | 267024             | True           | True        | True     |
| Birth               | -1026        | 219331             | True           | True        | True     |
| Birth               | -3649        | 237564             | True           | True        | True     |
| Birth               | 3586         | 270552             | True           | True        | True     |
| Birth               | 159          | 265988             | True           | True        | True     |
| <b>Lower limit</b>  | <b>-3649</b> | <b>219331</b>      |                |             |          |
| <b>Higher limit</b> | <b>4392</b>  | <b>270552</b>      |                |             |          |
| No birth            | 4579         | 297212             | True           | True        | True     |
| No birth            | 3282         | 347269             | False          | True        | True     |
| No birth            | -718         | 259290             | False          | False       | False    |
| No birth            | 938          | 317382             | False          | True        | True     |
| No birth            | 4443         | 266121             | True           | False       | True     |
| No birth            | 4549         | 245545             | True           | False       | True     |
| No birth            | 1824         | 407111             | False          | True        | True     |
| Coverage            | 0.728        | 0.810              |                |             | 0.923    |

Range limits of pregnancy in culture medium calculated over 36 embryos transferred.

Metabolite levels are classified in recipients that reached birth and lower and higher limits within each metabolite are highlighted. Metabolites that do not correctly fit in the assigned classification are colored.

Coverage represents the ROC-AUC values for single metabolites, and F1 score showed as correctly classified samples.

Concentrations are relative values (arbitrary units).

Supplemental Table S5

Relative concentrations by targeted GC-MS (with separation of blastocyst and morula as Day-6 embryonic stages) of metabolites selected in embryo culture medium (CM) containing BSA or FCS+BSA subtracted from blanks (CM with no embryos), measured in N=19 samples corresponding to embryos transferred to Holstein recipients that differed in reaching pregnancy to term or not

| CM                                                | Day-6 stage      | Pregnancy | N | Capric acid  | Glycerol monoesterate |
|---------------------------------------------------|------------------|-----------|---|--------------|-----------------------|
| FCS+BSA                                           | Early Blastocyst | Birth     | 4 | -0.529±0.066 | 1.463±1.585           |
| FCS+BSA                                           | Early blastocyst | No birth  | 7 | 0.012±0.052  | 4.549±1.261           |
| BSA                                               | Early blastocyst | No birth  | 2 | -0.187±0.086 | 0.746±2.083           |
| BSA                                               | Morula           | Birth     | 5 | 0.069±0.058  | 2.846±1.410           |
| BSA                                               | Morula           | No birth  | 1 | -0.030±0.132 | 3.465±3.183           |
| P Value                                           |                  |           |   | 0.270        | 0.577                 |
| Major effects                                     |                  |           |   | P values     |                       |
| CM                                                |                  |           |   | 0.123        | 0.164                 |
| Stage                                             |                  |           |   | 0.106        | 0.173                 |
| CM*Stage                                          |                  |           |   | 0.234        | 0.330                 |
| Pregnancy                                         |                  |           |   | 0.911        | 0.244                 |
| Data are LSMean±SEM. No differences were observed |                  |           |   |              |                       |

Supplemental Table S6

Embryo transfers with vitrified/warmed embryos and recipient breeds used in experiments and their pregnancy rates on Day-40, Day 62 and birth.

| Purpose                  | Metabolomic          |           | N  | Pregnancies (%) |         |        |
|--------------------------|----------------------|-----------|----|-----------------|---------|--------|
|                          | Technique            | Breed     |    | Day-40          | Day-62  | Birth  |
| Discovery <sup>1</sup>   | GC-qTOF (untargeted) | Holstein  | 17 | 11 (65)         | 10 (59) | 9 (53) |
| Discovery <sup>1</sup>   | GC-qTOF (untargeted) | AV        | 13 | 7 (54)          | 7 (54)  | 6 (46) |
| Discovery <sup>1,2</sup> | GC-qTOF (untargeted) | Crossbred | 6  | 4 (67)          | 4 (67)  | 4 (67) |
| Validation <sup>3</sup>  | GC-qTOF (targeted)   | Holstein  | 19 | 11 (58)         | 11 (58) | 9 (47) |

<sup>1</sup>: Discovery samples used to develop the models

<sup>2</sup>: Only embryo culture medium, not recipient plasma used from crossbred cattle.

<sup>3</sup>: Independent samples used to validate the models which were obtained after metabolite selection within discovery samples

AV: Asturiana de los Valles.

N: ETs performed
